# Supplementary material for: ABCB1 overexpression through locus amplification represents an actionable target to combat paclitaxel resistance in pancreatic cancer cells
Source: PubMed Central journal article supplement (PMC10759666; doi:10.1186/s13046-023-02879-8), 2024-01-02
Supplement: 13046_2023_2879_MOESM6_ESM.pdf [file 13046_2023_2879_MOESM6_ESM.pdf]

**A****Patu-T RNA-seq**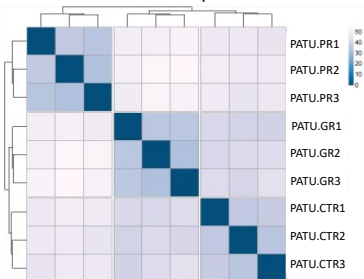**Suit-2.028 RNA-seq**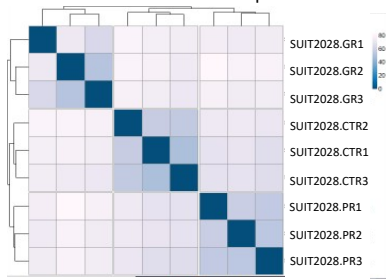**Patu-T Proteomics**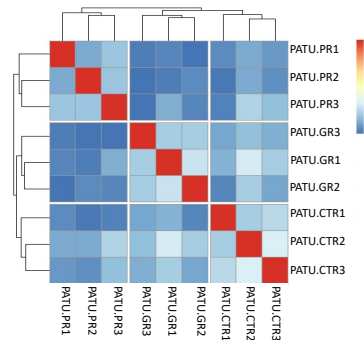**Suit-2.028 Proteomics**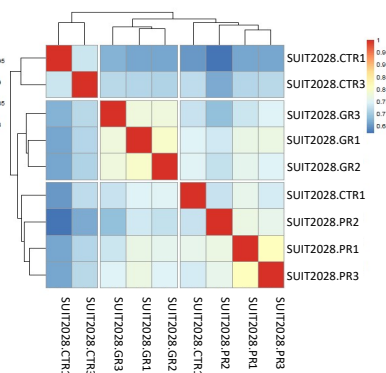**B****Patu-T RNA-seq**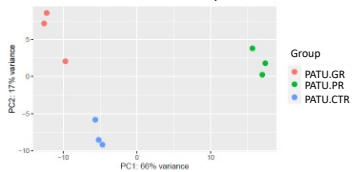**Suit-2.028 RNA-seq**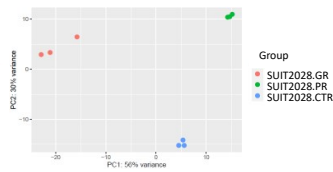**Patu-T Proteomics**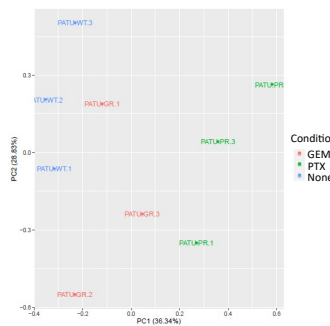**Suit-2.028 Proteomics**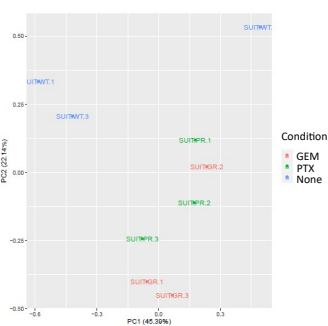**Fig. S1**
