# Supplementary material for: ABCB1 overexpression through locus amplification represents an actionable target to combat paclitaxel resistance in pancreatic cancer cells
Source: PubMed Central journal article supplement (PMC10759666; doi:10.1186/s13046-023-02879-8), 2024-01-02
Supplement: 13046_2023_2879_MOESM7_ESM.pdf [file 13046_2023_2879_MOESM7_ESM.pdf]

**Patu-T PR vs CTR**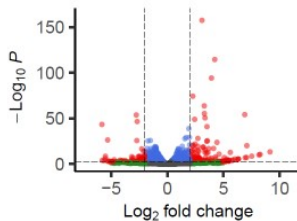

total = 15198 variables

**Suit-2.028 PR vs CTR**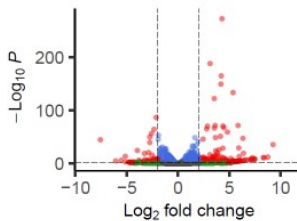

total = 15621 variables

● NS  
● Log<sub>2</sub> FC  
● p-value  
● p-value and log<sub>2</sub> FC

**RNA-seq****Patu-T PR vs CTR**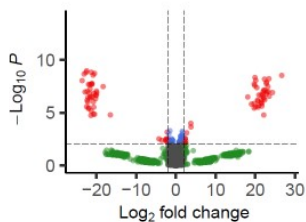

total = 5309 variables

**Suit-2.028 PR vs CTR**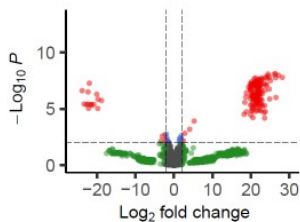

total = 5231 variables

● NS  
● Log<sub>2</sub> FC  
● p-value  
● p-value and log<sub>2</sub> FC

**Proteomics**
