# Supplementary material for: ABCB1 overexpression through locus amplification represents an actionable target to combat paclitaxel resistance in pancreatic cancer cells
Source: PubMed Central journal article supplement (PMC10759666; doi:10.1186/s13046-023-02879-8), 2024-01-02
Supplement: 13046_2023_2879_MOESM10_ESM.pdf [file 13046_2023_2879_MOESM10_ESM.pdf]

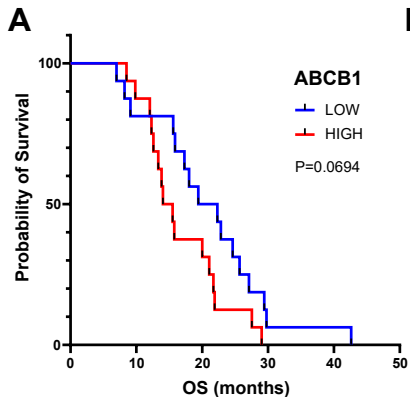

**B**

|                         | No, %   | OS   | Logrank P |
|-------------------------|---------|------|-----------|
| <b>Age, years</b>       |         |      |           |
| ≤65                     | 10 (31) | 19.9 | 0.707     |
| >65                     | 22 (69) | 18.1 |           |
| <b>Sex</b>              |         |      |           |
| Male                    | 19 (59) | 20.6 | 0.313     |
| Female                  | 13 (41) | 16.2 |           |
| <b>Grading</b>          |         |      |           |
| 1-2                     | 18 (56) | 20.6 | 0.243     |
| 3                       | 14 (44) | 16.5 |           |
| <b>ABCB1 expression</b> |         |      |           |
| low                     | 15 (47) | 20.8 | 0.0694    |
| high                    | 17 (53) | 14.7 |           |

Fig. S5
