# Supplementary material for: ABCB1 overexpression through locus amplification represents an actionable target to combat paclitaxel resistance in pancreatic cancer cells
Source: PubMed Central journal article supplement (PMC10759666; doi:10.1186/s13046-023-02879-8), 2024-01-02
Supplement: 13046_2023_2879_MOESM11_ESM.pdf [file 13046_2023_2879_MOESM11_ESM.pdf]

**A**

Patu-T PR

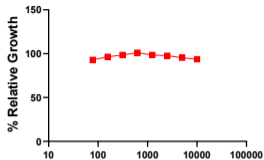

Verapamil [nM]

Suit-2.007 PR

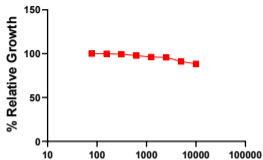

Verapamil [nM]

Suit-2.028 PR

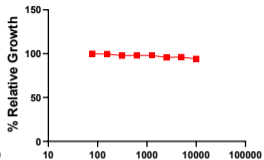

Verapamil [nM]

**B**

Patu-T CTR

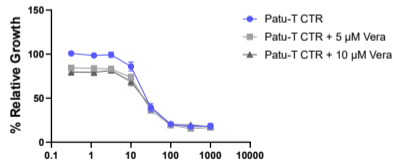

Gemcitabine [nM]

Patu-T GR

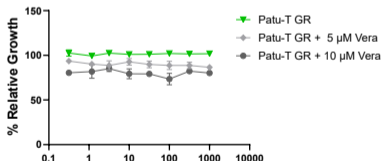

Gemcitabine [nM]

Fig. S6
