# Supplementary material for: ABCB1 overexpression through locus amplification represents an actionable target to combat paclitaxel resistance in pancreatic cancer cells
Source: PubMed Central journal article supplement (PMC10759666; doi:10.1186/s13046-023-02879-8), 2024-01-02

### Patu-T

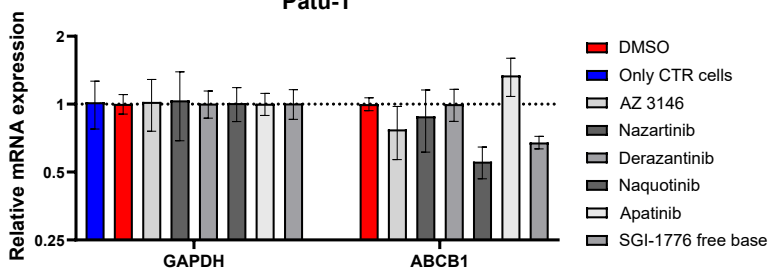

### Suit-2.007

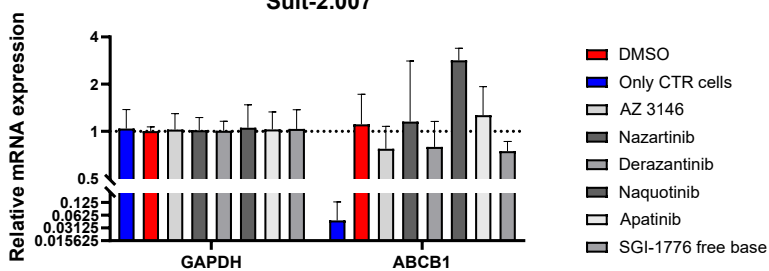

### Suit-2.028

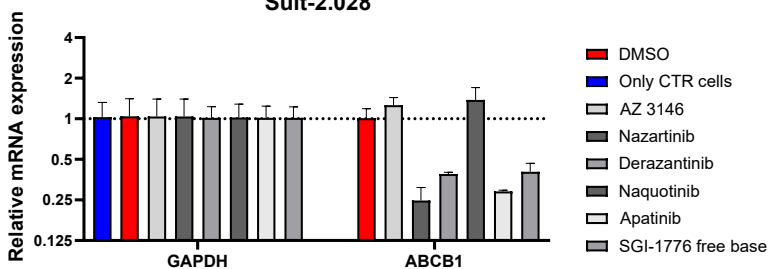

Supplement: 13046_2023_2879_MOESM13_ESM.pdf [file 13046_2023_2879_MOESM13_ESM.pdf]
